# Supplementary material for: Efficacy and safety of everolimus in combination with trastuzumab and paclitaxel in Asian patients with HER2+ advanced breast cancer in BOLERO-1
Source: PubMed Central journal article supplement (PMC5387380; doi:10.1186/s13058-017-0839-0), 2017-04-11
Supplement: 13058_2017_839_MOESM1_ESM.pdf [file 13058_2017_839_MOESM1_ESM.pdf]

## Supplementary Materials

**Supplementary Table 1** Dose reductions/interruptions in the Asian and non-Asian subsets (safety set)

|                                                   | Asian                   |                         | Non-Asian               |                         |
|---------------------------------------------------|-------------------------|-------------------------|-------------------------|-------------------------|
|                                                   | EVE                     | PBO                     | EVE                     | PBO                     |
|                                                   | + TRAS + PAC<br>n = 196 | + TRAS + PAC<br>n = 104 | + TRAS + PAC<br>n = 276 | + TRAS + PAC<br>n = 134 |
| Dose reductions/interruptions, n (%) <sup>*</sup> | 173 (88.3)              | 83 (79.8)               | 233 (84.4)              | 92 (68.7)               |
| Adverse event                                     | 165 (95.4)              | 59 (71.1)               | 222 (95.3)              | 69 (75.0)               |
| Dosing error                                      | 83 (48.0)               | 55 (66.3)               | 85 (36.5)               | 43 (46.7)               |
| Scheduling conflict                               | 5 (2.9)                 | 8 (9.6)                 | 15 (6.4)                | 11 (12.0)               |
| Concomitant medication affecting drug exposure    | 2 (1.2)                 | 2 (2.4)                 | 1 (0.4)                 | 1 (1.1)                 |
| Lab test abnormality                              | -                       | -                       | 1 (0.4)                 | 0 (0.0)                 |
| Missing                                           | 6 (3.5)                 | 3 (3.6)                 | 6 (2.6)                 | 2 (2.2)                 |

<sup>\*</sup>Number of patients with at least 1 dose reduction/interruption by reason  
*EVE* everolimus; *PAC* paclitaxel; *PBO* placebo; *TRAS* trastuzumab

**Supplementary Table 2** Investigator-assessed best overall response in the Asian and non-Asian subsets (full analysis set)

| Response rates, n (%)                      | Asian                          |                               | Non-Asian                      |                                |
|--------------------------------------------|--------------------------------|-------------------------------|--------------------------------|--------------------------------|
|                                            | EVE + TRAS + PAC               | PBO + TRAS + PAC              | EVE + TRAS + PAC               | PBO + TRAS + PAC               |
|                                            | n = 198                        | n = 105                       | n = 282                        | n = 134                        |
| Best overall response                      |                                |                               |                                |                                |
| Complete response (CR)                     | 11 (5.6)                       | 6 (5.7)                       | 16 (5.7)                       | 8 (6.0)                        |
| Partial response (PR)                      | 126 (63.6)                     | 67 (63.8)                     | 169 (59.9)                     | 84 (62.7)                      |
| Stable disease (SD)                        | 44 (22.2)                      | 26 (24.8)                     | 60 (21.3)                      | 29 (21.6)                      |
| Progressive disease (PD)                   | 3 (1.5)                        | 4 (3.8)                       | 13 (4.6)                       | 7 (5.2)                        |
| Unknown                                    | 14 (7.1)                       | 2 (1.9)                       | 24 (8.5)                       | 6 (4.5)                        |
| objective Response rate (ORR) <sup>*</sup> | 137 (69.2 [95% CI, 62.3-75.5]) | 73 (69.5 [95% CI, 59.8-78.1]) | 185 (65.6 [95% CI, 59.7-71.1]) | 92 (68.7 [95% CI, 60.1-76.4])  |
| Clinical benefit rate (CBR) <sup>†</sup>   | 160 (80.8 [95% CI, 74.6-86.0]) | 87 (82.9 [95% CI, 74.3-89.5]) | 204 (72.3 [95% CI, 66.7-77.5]) | 107 (79.9 [95% CI, 72.1-86.3]) |

<sup>\*</sup>ORR = CR + PR

<sup>†</sup>CBR = CR + PR + SD ≥ 24 weeks

*CI*, confidence interval; *EVE* everolimus; *PAC* paclitaxel; *PBO* placebo; *TRAS* trastuzumab

**Supplementary Table 3** Summary of G-CSF use in the Asian and non-Asian subsets (safety set)

|                                            | Asian                             |                                   |                             | Non-Asian                         |                                   |                                 |
|--------------------------------------------|-----------------------------------|-----------------------------------|-----------------------------|-----------------------------------|-----------------------------------|---------------------------------|
|                                            | EVE +<br>TRAS +<br>PAC<br>n = 196 | PBO +<br>TRAS +<br>PAC<br>n = 104 | Total<br>(Asian)<br>n = 300 | EVE +<br>TRAS +<br>PAC<br>n = 276 | PBO +<br>TRAS +<br>PAC<br>n = 134 | Total<br>(non-Asian)<br>n = 410 |
| Patients receiving at least 1 G-CSF, n (%) | 72 (36.73)                        | 31 (29.81)                        | 103 (34.33)                 | 12 (4.35)                         | 12 (8.96)                         | 24 (5.85)                       |
| Number of G-CSF, median (range)            | 5.0<br>(1.0-42.0)                 | 4.0<br>(1.0-55.0)                 | 5.0<br>(1.0-55.0)           | 1.0<br>(1.0-32.0)                 | 2.5<br>(1.0-21.0)                 | 2.0<br>(1.0-32.0)               |

*EVE* everolimus; *G-CSF*, granulocyte-colony stimulating factor *PAC* paclitaxel; *PBO* placebo; *TRAS* trastuzumab

**Supplementary Table 4** Adverse events leading to discontinuation in the Asian and non-Asian subsets

| Adverse event, %              | Asian                          | Asian                          | Non-Asian                      | Non-Asian                      |
|-------------------------------|--------------------------------|--------------------------------|--------------------------------|--------------------------------|
|                               | EVE + TRAS +<br>PAC<br>n = 196 | PBO + TRAS +<br>PAC<br>n = 104 | EVE + TRAS +<br>PAC<br>n = 276 | PBO + TRAS +<br>PAC<br>n = 134 |
| Neurotoxicity                 | 14.8                           | 17.3                           | 0.0                            | 0.0                            |
| Hypoesthesia                  | 8.7                            | 7.7                            | 0.0                            | 0.0                            |
| Stomatitis                    | 5.6                            | 0.0                            | 2.9                            | 0.7                            |
| Peripheral sensory neuropathy | 4.1                            | 4.8                            | 2.9                            | 3.0                            |
| Pneumonitis                   | 4.1                            | 0.0                            | 6.9                            | 0.7                            |
| Neutropenia                   | 3.1                            | 1.9                            | 2.9                            | 0.7                            |
| Left ventricular dysfunction  | 3.1                            | 0.0                            | 2.2                            | 2.2                            |
| Pneumonia                     | 3.1                            | 0.0                            | 0.4                            | 0.0                            |
| Mouth ulceration              | 2.6                            | 0.0                            | 0.0                            | 0.0                            |
| Fatigue                       | 2.0                            | 5.8                            | 4.0                            | 0.7                            |
| Interstitial lung disease     | 2.0                            | 0.0                            | 0.7                            | 0.0                            |

*EVE* everolimus; *PAC* paclitaxel; *PBO* placebo; *TRAS* trastuzumab

**Supplementary Table 5** Serious adverse events (incidence  $\geq 2\%$  in any arm) in the Asian and non-Asian subsets (safety set)

| Adverse event, %          | Asian               |                     | Non-Asian           |                     |
|---------------------------|---------------------|---------------------|---------------------|---------------------|
|                           | EVE + TRAS +<br>PAC | PBO + TRAS +<br>PAC | EVE + TRAS +<br>PAC | PBO + TRAS +<br>PAC |
|                           | n = 196             | n = 104             | n = 276             | n = 134             |
| Pneumonia                 | 5.1                 | 0.0                 | 3.3                 | 0.0                 |
| Pneumonitis               | 3.1                 | 0.0                 | 5.4                 | 0.0                 |
| Interstitial lung disease | 3.1                 | 0.0                 | 0.4                 | 0.0                 |
| Pyrexia                   | 2.6                 | 0.0                 | 2.5                 | 1.5                 |
| Hyperglycemia             | 2.6                 | 0.0                 | 0.4                 | 0.0                 |
| Dizziness                 | 2.6                 | 0.0                 | 0.0                 | 0.0                 |
| Cellulitis                | 2.0                 | 1.0                 | 0.4                 | 1.5                 |
| Dyspnea                   | 0.5                 | 0.0                 | 3.6                 | 0.7                 |
| Device related infection  | 0.5                 | 1.0                 | 3.3                 | 0.7                 |
| Stomatitis                | 0.0                 | 0.0                 | 3.6                 | 0.0                 |
| Infusion related reaction | 0.0                 | 0.0                 | 0.4                 | 2.2                 |

*EVE* everolimus; *PAC* paclitaxel; *PBO* placebo; *TRAS* trastuzumab

**Supplementary Table 6** On-treatment deaths in the Asian and non-Asian subsets (safety set)

| Deaths, n (%)             | Asian               |                     | Non-Asian           |                     |
|---------------------------|---------------------|---------------------|---------------------|---------------------|
|                           | EVE + TRAS +<br>PAC | PBO + TRAS +<br>PAC | EVE + TRAS +<br>PAC | PBO + TRAS +<br>PAC |
|                           | n = 196             | n = 104             | n = 276             | n = 134             |
| Total                     | 3 (1.5)             | 0                   | 19 (6.9)            | 2 (1.5)             |
| Disease progression       | 1 (0.5)             | 0                   | 4 (1.4)             | 2 (1.5)             |
| Pneumonia                 | 1 (0.5)             | 0                   | 0                   | 0                   |
| Sepsis                    | 1 (0.5)             | 0                   | 1 (0.4)             | 0                   |
| Pneumonitis               | 0                   | 0                   | 3 (1.1)             | 0                   |
| Pulmonary embolism        | 0                   | 0                   | 2 (0.7)             | 0                   |
| Acute respiratory failure | 0                   | 0                   | 1 (0.4)             | 0                   |
| Pulmonary edema           | 0                   | 0                   | 1 (0.4)             | 0                   |
| Respiratory failure       | 0                   | 0                   | 1 (0.4)             | 0                   |
| Pneumococcal pneumonia    | 0                   | 0                   | 1 (0.4)             | 0                   |
| Urosepsis                 | 0                   | 0                   | 1 (0.4)             | 0                   |
| Cardio-respiratory arrest | 0                   | 0                   | 1 (0.4)             | 0                   |
| Diabetic ketoacidosis     | 0                   | 0                   | 1 (0.4)             | 0                   |
| Cerebrovascular accident  | 0                   | 0                   | 1 (0.4)             | 0                   |

Fall 0 0 1 (0.4) 0  
*EVE* everolimus; *PAC* paclitaxel; *PBO* placebo; *TRAS* trastuzumab
